# Supplementary material for: Effect of Erythropoietin Administration on Myocardial Viability and Coronary Microvascular Dysfunction in Anterior Acute Myocardial Infarction: Randomized Controlled Trial in the Japanese Population
Source: PubMed Central journal article supplement — Cardiol Ther. 2018 Oct 23;7(2):151–62. doi: 10.1007/s40119-018-0122-1 (PMC6251819; doi:10.1007/s40119-018-0122-1), 2018-10-23
Supplement: 40119_2018_122_MOESM1_ESM.pdf [file 40119_2018_122_MOESM1_ESM.pdf]

**SUPPLEMENTARY MATERIAL**

**Supplemental Table 1. Echocardiographic Measurements**

|                                                                                | EPO (n=32)           | Control (n=29)     |
|--------------------------------------------------------------------------------|----------------------|--------------------|
| LV diastolic diameter / systolic diameter (mm)                                 |                      |                    |
| 1 week                                                                         | 46 ± 6 / 33 ± 6      | 47 ± 6 / 32 ± 5    |
| 1 month                                                                        | 45 ± 5 / 30 ± 5      | 45 ± 5 / 31 ± 5    |
| 8 months                                                                       | 45 ± 5 / 31 ± 6      | 46 ± 4 / 32 ± 5    |
| LV endodiastolic volume / endosystolic volume (ml)                             |                      |                    |
| 1 week                                                                         | 107 ± 27 / 57 ± 19   | 106 ± 28 / 55 ± 18 |
| 1 month                                                                        | 93 ± 26 / 47 ± 19    | 98 ± 18 / 48 ± 13  |
| 8 months                                                                       | 96 ± 25 / 46 ± 17    | 100 ± 27 / 51 ± 21 |
| LV ejection fraction (%)                                                       |                      |                    |
| 1 week                                                                         | 48 ± 7 <sup>†</sup>  | 49 ± 6             |
| 1 month                                                                        | 51 ± 7               | 52 ± 6             |
| 8 months                                                                       | 53 ± 7               | 51 ± 8             |
| LV mass index (g/m <sup>2</sup> )                                              |                      |                    |
| 1 week                                                                         | 101 ± 29             | 104 ± 20           |
| 1 month                                                                        | 96 ± 31              | 101 ± 25           |
| 8 months                                                                       | 92 ± 25              | 101 ± 24           |
| Left atrial volume (ml)                                                        |                      |                    |
| 1 week                                                                         | 55 ± 17              | 58 ± 20            |
| 1 month                                                                        | 48 ± 13              | 55 ± 19            |
| 8 months                                                                       | 47 ± 11 <sup>¶</sup> | 65 ± 20            |
| <sup>†</sup> p = 0.041 versus 8 months, <sup>¶</sup> p = 0.0002 versus control |                      |                    |
| EPO, erythropoietin                                                            |                      |                    |

**Supplemental Table 2. Blood Cell Count**

|                                                                          | Baseline         | 7 days           | 1 month          | 8 months         |
|--------------------------------------------------------------------------|------------------|------------------|------------------|------------------|
| RBC ( $10^4$ cells/ $\mu$ l)                                             |                  |                  |                  |                  |
| EPO                                                                      | 438.9 $\pm$ 56.8 | 411.8 $\pm$ 53.2 | 426.7 $\pm$ 60.7 | 435.7 $\pm$ 44.6 |
| Control                                                                  | 445.3 $\pm$ 51.9 | 416.3 $\pm$ 51.9 | 428.3 $\pm$ 45.9 | 427.8 $\pm$ 53.6 |
| Hb (g/dl)                                                                |                  |                  |                  |                  |
| EPO                                                                      | 14.1 $\pm$ 1.9   | 13.0 $\pm$ 1.7   | 13.3 $\pm$ 1.8   | 13.4 $\pm$ 1.4   |
| Control                                                                  | 13.9 $\pm$ 2.0   | 12.7 $\pm$ 1.9   | 13.0 $\pm$ 1.4   | 13.1 $\pm$ 1.6   |
| Ht (%)                                                                   |                  |                  |                  |                  |
| EPO                                                                      | 40.4 $\pm$ 4.9   | 37.6 $\pm$ 6.6   | 39.3 $\pm$ 5.0   | 39.8 $\pm$ 3.9   |
| Control                                                                  | 40.2 $\pm$ 5.1   | 38.0 $\pm$ 5.2   | 38.9 $\pm$ 4.0   | 39.3 $\pm$ 4.6   |
| EPO, erythropoietin; RBC, red blood cell; Hb, hemoglobin; Ht, hematocrit |                  |                  |                  |                  |
